# Supplementary material for: l-Rhamnose Metabolism in Clostridium beijerinckii Strain DSM 6423
Source: PubMed Central journal article supplement (PMC6384099; doi:10.1128/aem.02656-18), 2019-02-20
Supplement: AEM.02656-18-s0001.pdf [file AEM.02656-18-s0001.pdf]

1 **Supplementary material**

2 **Diallo et al**

3

4 **Table S1. Fermentation of *Ulva lactuca* hydrolysates by *C. beijerinckii*.** As controls,  
 5 cultures on D-glucose, L-rhamnose, and a mix of D-glucose, L-rhamnose and D-xylose  
 6 (G/R/X) were carried out. Codes: H-*Ulva*, hydrolysate of *Ulva lactuca* prepared as previously  
 7 described (1); H-*Ulva* + N, indicates H-*Ulva* supplemented with nutrients as in CM2 medium;  
 8 DH-*Ulva* indicates H-*Ulva* diluted 1:1 with demiwater; DH-*Ulva*+ N indicates H-*Ulva*+N diluted  
 9 1:1 with demiwater. In brackets, the times at which the last sample of the cultures was taken.

10

|                                                   | Glucose<br>(144h) | Rhamnose<br>(144 h) | G/R/X<br>(t=167h) | H- <i>Ulva</i><br>(144h) | H- <i>Ulva</i> +N<br>(t=144h) | DH- <i>Ulva</i><br>(t=167h) | DH- <i>Ulva</i> + N<br>(t=167h) |
|---------------------------------------------------|-------------------|---------------------|-------------------|--------------------------|-------------------------------|-----------------------------|---------------------------------|
| <b>Substrates at t=0 (mM)</b>                     |                   |                     |                   |                          |                               |                             |                                 |
| D-Glucose                                         | 209.2             |                     | 141.0             | 114.7                    | 102.9                         | 57.3                        | 51.4                            |
| L-Rhamnose                                        |                   | 238.7               | 156.6             | 85.8                     | 74.5                          | 42.9                        | 37.3                            |
| D-xylose                                          |                   |                     | 36.6              | 28.2                     | 24.9                          | 14.1                        | 12.5                            |
| Acetate                                           | 36.5              | 35.0                | 36.1              | 9.8                      | 46.5                          | 4.9                         | 23.2                            |
| <b>Substrates consumed (mM)</b>                   |                   |                     |                   |                          |                               |                             |                                 |
| D-Glucose                                         | 164.3             |                     | 141.0             | 21.9                     | 21.3                          | 52.9                        | 50.3                            |
| L-Rhamnose                                        |                   | 42.9                | 43.3              |                          |                               | 8.2                         | 5.0                             |
| Xylose                                            |                   |                     | 34.6              |                          |                               | 6.8                         | 7.1                             |
| Acetate*                                          | 23.6              |                     | 5.5               |                          |                               |                             | 10.2                            |
| <b>Products at end (mM)</b>                       |                   |                     |                   |                          |                               |                             |                                 |
| Acetate*                                          |                   | 17.7                |                   | 27.1                     | 60.9                          | 17.5                        |                                 |
| Butyrate                                          | 6.9               | 13.8                | 17.3              | 6.2                      | 6.8                           | 27.7                        | 47.6                            |
| Isopropanol                                       | 31.9              | nd                  | 23.0              | 7.5                      | 7.0                           | 6.2                         | 10.5                            |
| Ethanol                                           | 2.6               | nd                  | 6.3               | nd                       | nd                            | nd                          | nd                              |
| Butanol                                           | 84.1              | nd                  | 72.7              | 13.2                     | 10.1                          | 21.3                        | 36.8                            |
| 1,2-Propanediol                                   | nd                | 15.0                | 22.6              | nd                       | nd                            | nd                          | 0.8                             |
| Propanol                                          | nd                | 19.0                | nd                | nd                       | nd                            | nd                          | nd                              |
| Propionate                                        | nd                | 7.0                 | 9.6               | nd                       | nd                            | nd                          | nd                              |
| <b>Yields</b>                                     |                   |                     |                   |                          |                               |                             |                                 |
| mM IBE/mM<br>(D-Glucose+D-<br>xylose)<br>consumed | 0.72              |                     | 0.58              | 0.94                     | 0.80                          | 0.46                        | 0.82                            |

11 \*Acetate was present in the media as component, and in case it was utilized it is considered as a  
 12 substrate. When acetate is produced, it is considered as a product and the end concentration in the  
 13 cultures is indicated. "nd" indicates not detected.

14 **Table S2. Salt content in the *U. lactuca* hydrolysate, calculated from the analysis data**  
 15 **shown in Bikker et al (1).**

| Element | Concentration (mM) |
|---------|--------------------|
| K       | 73                 |
| Mg      | 185                |
| Na      | 67                 |
| Cl      | 32                 |
| S       | 304                |

16

17

18

19 **Table S3. Mapping overview of the performed RNA sequencing.**

| Sample | Time point [h] | Total number of reads | Number of unmapped reads | Number of reliable reads [%] |
|--------|----------------|-----------------------|--------------------------|------------------------------|
| Glc_1  | 3              | 5,354,497             | 33,708                   | 96.17                        |
| Glc_1  | 5              | 4,331,116             | 20,562                   | 96.94                        |
| Glc_1  | 9.5            | 4,721,967             | 19,719                   | 96.71                        |
| Glc_2  | 3              | 4,466,679             | 54,964                   | 94.88                        |
| Glc_2  | 5              | 4,700,384             | 23,416                   | 95.86                        |
| Glc_2  | 9.5            | 5,175,736             | 23,026                   | 95.71                        |
| Rha_1  | 3              | 4,505,619             | 17,259                   | 98.60                        |
| Rha_1  | 6.5            | 4,718,680             | 43,935                   | 97.52                        |
| Rha_1  | 10             | 4,284,034             | 105,542                  | 95.84                        |
| Rha_2  | 3              | 4,525,859             | 28,847                   | 98.20                        |
| Rha_2  | 6.5            | 4,987,878             | 53,998                   | 97.19                        |
| Rha_2  | 10             | 4,320,185             | 191,739                  | 93.71                        |

20

21

22 **Table S4: Relative expression value of genes belonging to the L-rhamnose conversion**  
 23 **cluster but involved in other pathways**

| <i>C. beijerinckii</i><br>protein                                       | Predicted function                                                                    | Log2 fold change in<br>expression relative to D-<br>glucose |       |      |
|-------------------------------------------------------------------------|---------------------------------------------------------------------------------------|-------------------------------------------------------------|-------|------|
|                                                                         |                                                                                       | 3 h                                                         | 6.5 h | 10 h |
| <b>chondroitin sulfate degradation / rhamnogalacturonan degradation</b> |                                                                                       |                                                             |       |      |
| CIBE_0607                                                               | 4-deoxy-L-threo-5-hexosulose-uronate ketol-isomerase, 5-keto-4-deoxyuronate isomerase | 7.74                                                        | 7.65  | 6.56 |
| CIBE_0608                                                               | 2-keto-3-deoxygluconate oxidoreductase                                                | 6.92                                                        | 7.04  | 6.21 |
| CIBE_0610                                                               | Glycosyl hydrolase, family 88, rhiN                                                   | 6.65                                                        | 6.57  | 6.43 |
| <b>unknown function</b>                                                 |                                                                                       |                                                             |       |      |
| CIBE_0609                                                               | protein of unknown function                                                           | 6.22                                                        | 6.67  | 6.89 |
| CIBE_0611                                                               | Xylose isomerase domain protein TIM barrel                                            | 4.03                                                        | 4.11  | 4.04 |

24

25

26

27

28 **Table S5. Differential expression during growth on L-rhamnose relative to D-glucose of**  
 29 **the genes involved in the central metabolism.** The clusters and gene assignments were  
 30 based on the transcriptome study of Mate de Gerando et al (2)

| <i>C. beijerinckii</i> protein   | Predicted function                        | Log2 fold change in expression relative to D-glucose cultures |       |       |
|----------------------------------|-------------------------------------------|---------------------------------------------------------------|-------|-------|
|                                  |                                           | 3 h                                                           | 6.5 h | 10 h  |
| <b>Glycolysis</b>                |                                           |                                                               |       |       |
| CIBE_0769                        | glyceraldehyde-3-phosphate dehydrogenase  | -1.19                                                         | -2.55 | -1.53 |
| CIBE_2315                        | fructose-1,6-bisphosphate aldolase        | -1.08                                                         | -1.99 | -1.22 |
| CIBE_0770                        | phosphoglycerate kinase                   | n.d                                                           | -2.45 | -1.59 |
| CIBE_0414                        | glucose-6-phosphate isomerase             | n.d                                                           | -1.35 | -1.12 |
| CIBE_0771                        | triose phosphate isomerase                | n.d                                                           | -2.41 | -1.29 |
| CIBE_5856                        | 6-phosphofructokinase                     | -2.76                                                         | -2.16 | n.d   |
| CIBE_0774                        | enolase                                   | 1.33                                                          | n.d   | n.d   |
| CIBE_0772                        | phosphoglycerate mutase                   | n.d                                                           | -1.09 | n.d   |
| CIBE_1193                        | 6-phosphofructokinase 2                   | 4.98                                                          | 2.33  | n.d   |
| CIBE_0655                        | Pyruvate kinase                           | n.d                                                           | -0.91 | n.d   |
| CIBE_0755                        | Phosphofructokinase                       | -2.3                                                          | n.d   | n.d   |
| CIBE_3600                        | Fructose-bisphosphate aldolase class 1    | 2.37                                                          | 3.68  | n.d   |
| CIBE_5451                        | fructose-1,6-bisphosphatase               | n.d                                                           | n.d   | -0.82 |
| CIBE_2174                        | Phosphoglycerate mutase                   | n.d                                                           | n.d   | -0.96 |
| CIBE_5855                        | pyruvate kinase                           | -3.44                                                         | -2.56 | n.d   |
| CIBE_5461                        | putative fructose-bisphosphate aldolase   | 1.17                                                          | 1.55  | 1.07  |
| CIBE_5876                        | putative transketolase N-terminal section | -1.5                                                          | -1.99 | -1.37 |
| <b>Pentose phosphate pathway</b> |                                           |                                                               |       |       |
| CIBE_5875                        | putative transketolase C-terminal section | -1.32                                                         | -1.87 | -1.05 |
| CIBE_0561                        | ribose 5-phosphate epimerase              | n.d                                                           | -1.11 | -1.04 |
| CIBE_1389                        | ribulose-5-phosphate 3-epimerase          | n.d                                                           | -1.4  | -0.89 |
| CIBE_3260                        | Transaldolase                             | 2.82                                                          | n.d   | n.d   |
| CIBE_5350                        | putative transaldolase                    | 1.86                                                          | n.d   | n.d   |
| CIBE_0719                        | ribose 5-phosphate epimerase              | -1.53                                                         | n.d   | 1.84  |
| CIBE_2821                        | putative transaldolase                    | 2.02                                                          | 1.3   | -0.77 |
| <b>Acidogenesis</b>              |                                           |                                                               |       |       |
| CIBE_2950                        | Histidine kinase                          | 1.1                                                           | n.d   | n.d   |
| CIBE_5186                        | Pyruvate-flavodoxin oxidoreductase        | n.d                                                           | -2.73 | -3.12 |
| CIBE_0565                        | degradative acetoacetyl-CoA thiolase      | -2.74                                                         | -3.26 | -4.02 |
| CIBE_0339                        | putative Methylglutaconyl-CoA hydratase   | -2.28                                                         | -2.82 | -3.84 |

| <i>C. beijerinckii</i> protein | Predicted function                                           | Log2 fold change in expression relative to D-glucose cultures |       |       |
|--------------------------------|--------------------------------------------------------------|---------------------------------------------------------------|-------|-------|
|                                |                                                              | 3 h                                                           | 6.5 h | 10 h  |
| CIBE_6076                      | Acyl-CoA dehydrogenase                                       | 2.32                                                          | n.d   | n.d   |
| CIBE_0343                      | 3-hydroxybutyryl-CoA dehydrogenase                           | -2.58                                                         | -3.06 | -3.87 |
| CIBE_1400                      | Phosphate acetyltransferase                                  | n.d                                                           | -2.43 | -1.68 |
| CIBE_0224                      | Butyrate kinase                                              | -2.73                                                         | -3.42 | -2.78 |
| CIBE_1401                      | acetate kinase                                               | n.d                                                           | -2.3  | -1.35 |
| CIBE_0223                      | phosphate butyryl coenzyme A transferase                     | -2.64                                                         | -3.26 | -2.69 |
| CIBE_1204                      | pyruvate formate lyase I                                     | -1.36                                                         | -1.81 | -1.69 |
| CIBE_1205                      | pyruvate formate lyase activating enzyme 1                   | n.d                                                           | n.d   | -1.58 |
| CIBE_4880                      | Pyruvate flavodoxin/ferredoxin oxidoreductase domain protein | 2.83                                                          | 3.43  | -0.78 |
| CIBE_4879                      | Pyruvate ferredoxin/flavodoxin oxidoreductase, beta subunit  | 2.85                                                          | 3.57  | -0.94 |
| CIBE_3432                      | acyl-CoA dehydrogenase                                       | 3.26                                                          | 2.42  | -2.26 |
| CIBE_4352                      | Pyruvate flavodoxin/ferredoxin oxidoreductase domain protein | 2.04                                                          | 1     | n.d   |
| CIBE_4218                      | acyl-CoA dehydrogenase                                       | 1.52                                                          | 3.31  | n.d   |
| CIBE_0327                      | Electron transfer flavoprotein subunit beta                  | -2                                                            | n.d   | -4.01 |
| CIBE_0328                      | Electron transfer flavoprotein subunit alpha                 | -1.36                                                         | n.d   | -3.71 |
| CIBE_1564                      | putative beta-hydroxyacid dehydrogenase                      | n.d                                                           | -1.03 | n.d   |
| CIBE_4841                      | Butyrate kinase                                              | 1.73                                                          | 1.35  | 1     |
| CIBE_4329                      | acetyl-CoA acetyltransferase                                 | n.d                                                           | -1.76 | -1.48 |
| CIBE_5515                      | Butyrate kinase                                              | 2.69                                                          | 2.41  | 2.37  |
| CIBE_1684                      | Pyruvate-flavodoxin oxidoreductase                           | 1.16                                                          | n.d   | 2.75  |
| CIBE_5454                      | putative Methylglutaconyl-CoA hydratase                      | 1.81                                                          | 3.92  | 1.44  |
| CIBE_0340                      | acyl-CoA dehydrogenase                                       | -2.6                                                          | -3.24 | -4.03 |
| CIBE_2634                      | putative hydroxyacid dehydrogenase                           | 2.12                                                          | n.d   | n.d   |
| CIBE_5833                      | 3-oxoacyl-(Acyl-carrier-protein) synthase III                | -1.49                                                         | n.d   | n.d   |
| CIBE_5834                      | Acetoacetyl-CoA reductase                                    | -1.5                                                          | n.d   | n.d   |
| <b>A/IBE production</b>        |                                                              |                                                               |       |       |
| CIBE_0565                      | degradative acetoacetyl-CoA thiolase                         | -2.74                                                         | -3.26 | -4.02 |
| CIBE_6076                      | Acyl-CoA dehydrogenase                                       | 2.32                                                          | n.d   | n.d   |
| CIBE_4607                      | putative aminoacyloate CoA-transferase                       | -3.67                                                         | -1.97 | -4.87 |
| CIBE_4609                      | Acetoacetate decarboxylase                                   | -3.55                                                         | -1.3  | -4.2  |
| CIBE_3470                      | NADP-dependent isopropanol dehydrogenase                     | n.d                                                           | n.d   | -4.63 |
| CIBE_2050                      | NADPH-dependent butanol dehydrogenase                        | 3.92                                                          | n.d   | -1.75 |
| CIBE_3149                      | putative acyloate-acetoacetate CoA-transferase               | 2.76                                                          | 4.1   | n.d   |
| CIBE_3150                      | acetoacetyl CoA-transferase (subunit A)                      | 3.97                                                          | 4.28  | n.d   |

| <i>C. beijerinckii</i> protein | Predicted function                                                   | Log2 fold change in expression relative to D-glucose cultures |       |       |
|--------------------------------|----------------------------------------------------------------------|---------------------------------------------------------------|-------|-------|
|                                |                                                                      | 3 h                                                           | 6.5 h | 10 h  |
| CIBE_3970                      | Acetate CoA-transferase YdiF                                         | n.d                                                           | -1.2  | -2.52 |
| CIBE_5462                      | Iron-containing alcohol dehydrogenase                                | 2.67                                                          | 3.13  | n.d   |
| CIBE_2622                      | NADPH-dependent butanol dehydrogenase                                | 4.47                                                          | 3.53  | 1.44  |
| CIBE_2354                      | Alcohol dehydrogenase                                                | -1.31                                                         | n.d   | n.d   |
| CIBE_5453                      | short chain acyl-CoA transferase: fused alpha subunit ; beta subunit | 1.11                                                          | 3.13  | 1.67  |

31

32

33 **Table S6: Differential expression of the genes involved in other stationary phase**  
 34 **processes. For stress response genes, a comparison was made with data from (3)**

| <i>C. beijerinckii</i><br>protein |                                                                               | predicted function | Log2 fold change in expression<br>in L-rhamnose relative to D-<br>glucose |       |       |
|-----------------------------------|-------------------------------------------------------------------------------|--------------------|---------------------------------------------------------------------------|-------|-------|
|                                   |                                                                               |                    | 3 h                                                                       | 6.5 h | 10 h  |
| <b>sporulation</b>                |                                                                               |                    |                                                                           |       |       |
| CIBE_0044                         | putative 2-phosphosulfolactate phosphatase                                    |                    | -1.57                                                                     | n.d   | n.d   |
| CIBE_0055                         | Spore maturation protein                                                      |                    | n.d                                                                       | 2.27  | -0.78 |
| CIBE_0056                         | spore maturation protein                                                      |                    | n.d                                                                       | 2.37  | n.d   |
| CIBE_0064                         | conserved protein of unknown function                                         |                    | 1.77                                                                      | 3.72  | n.d   |
| CIBE_0089                         | regulator required for spore cortex synthesis (stage V sporulation)           |                    | 1.58                                                                      | n.d   | -0.86 |
| CIBE_0098                         | transcriptional regulator                                                     |                    | 2.38                                                                      | 1.22  | 2.6   |
| CIBE_0099                         | Stage V sporulation protein B                                                 |                    | n.d                                                                       | 2.99  | n.d   |
| CIBE_0103                         | YabP family protein                                                           |                    | n.d                                                                       | 2.74  | n.d   |
| CIBE_0104                         | Spore cortex biosynthesis protein YabQ                                        |                    | n.d                                                                       | 3.09  | n.d   |
| CIBE_0107                         | Sporulation protein, spoII E                                                  |                    | n.d                                                                       | 4.12  | -2.79 |
| CIBE_0132                         | subunit of a sporulation, competence and biofilm formation regulatory complex |                    | n.d                                                                       | -1.02 | -1.1  |
| CIBE_0218                         | Cell wall hydrolase, SleB                                                     |                    | n.d                                                                       | 4.03  | n.d   |
| CIBE_0504                         | Histidine kinase                                                              |                    | 1.69                                                                      | n.d   | n.d   |
| CIBE_0535                         | Spore coat protein CotS                                                       |                    | 1.43                                                                      | 2.72  | 2.16  |
| CIBE_0537                         | conserved protein of unknown function                                         |                    | 2.66                                                                      | 5.23  | n.d   |
| CIBE_0549                         | Sporulation stage II, protein R                                               |                    | -1.81                                                                     | n.d   | n.d   |
| CIBE_0578                         | Peptidase M23B                                                                |                    | 1.34                                                                      | 5.61  | n.d   |
| CIBE_0579                         | transcriptional regulator                                                     |                    | n.d                                                                       | 5.57  | n.d   |
| CIBE_0641                         | Small, acid-soluble spore protein 1                                           |                    | -2.02                                                                     | n.d   | 1.94  |
| CIBE_0672                         | Peptidase M50                                                                 |                    | n.d                                                                       | 3.72  | 0.83  |
| CIBE_0730                         | conserved protein of unknown function                                         |                    | 1.37                                                                      | n.d   | n.d   |
| CIBE_0739                         | Stage V sporulation protein R                                                 |                    | 3.38                                                                      | 4.62  | n.d   |
| CIBE_0761                         | Histidine kinase                                                              |                    | n.d                                                                       | n.d   | -0.77 |
| CIBE_0992                         | Anti-sigma F factor antagonist                                                |                    | n.d                                                                       | n.d   | -3.08 |
| CIBE_0994                         | RNA polymerase sporulation-specific sigma factor (sigma-F)                    |                    | n.d                                                                       | n.d   | -2.4  |
| CIBE_1003                         | Stage II sporulation protein P                                                |                    | n.d                                                                       | 4.23  | -1.01 |
| CIBE_1023                         | putative stage IV sporulation YqfD                                            |                    | n.d                                                                       | n.d   | -0.88 |
| CIBE_1036                         | Spore coat protein CotS                                                       |                    | 2.2                                                                       | 5.72  | n.d   |
| CIBE_1351                         | RNA polymerase sporulation-specific sigma-29 factor (sigma-K)                 |                    | 2.85                                                                      | 3.13  | 1.72  |
| CIBE_1355                         | Peptidase U4, Sporulation sigma-E factor-processing peptidase                 |                    | n.d                                                                       | 3.04  | -2.12 |
| CIBE_1356                         | RNA polymerase sporulation-specific sigma-29 factor (sigma-E)                 |                    | n.d                                                                       | 3.5   | -2.17 |

| <i>C. beijerinckii</i><br>protein |                                                                                                     | predicted function | Log2 fold change in expression<br>in L-rhamnose relative to D-<br>glucose |                                                            |      |
|-----------------------------------|-----------------------------------------------------------------------------------------------------|--------------------|---------------------------------------------------------------------------|------------------------------------------------------------|------|
|                                   |                                                                                                     |                    | 3 h                                                                       | 6.5 h                                                      | 10 h |
|                                   |                                                                                                     |                    | CIBE_1357                                                                 | RNA polymerase sporulation-specific sigma factor (sigma-G) | 1.44 |
| CIBE_1358                         | essential sporulation protein                                                                       | 2.07               | 4.11                                                                      | -1.47                                                      |      |
| CIBE_1362                         | Multi-sensor signal transduction histidine kinase                                                   | n.d                | n.d                                                                       | -0.75                                                      |      |
| CIBE_1373                         | morphogenetic stage IV sporulation protein                                                          | 3.23               | 5.13                                                                      | -1.14                                                      |      |
| CIBE_1376                         | essential sporulation DNA binding protein; regulator of biofilm formation                           | n.d                | n.d                                                                       | -0.97                                                      |      |
| CIBE_1398                         | Sporulation integral membrane protein YIbJ                                                          | n.d                | 3.96                                                                      | n.d                                                        |      |
| CIBE_1448                         | Sporulation protein YImC/YmxH                                                                       | n.d                | 1.86                                                                      | n.d                                                        |      |
| CIBE_1451                         | spore DNA translocase                                                                               | 1.21               | n.d                                                                       | -0.86                                                      |      |
| CIBE_1456                         | regulator required for dehydration of the spore core and assembly of the coat (stage V sporulation) | 5.93               | 2.02                                                                      | 1.96                                                       |      |
| CIBE_1525                         | Sporulation protein                                                                                 | 2.39               | 5.12                                                                      | 3.69                                                       |      |
| CIBE_1586                         | conserved protein of unknown function                                                               | 2.69               | 5.34                                                                      | 5.4                                                        |      |
| CIBE_1605                         | Sporulation protein SpoVB                                                                           | n.d                | 4.03                                                                      | n.d                                                        |      |
| CIBE_1674                         | Small, acid-soluble spore protein beta                                                              | 4.74               | 1.55                                                                      | 4.77                                                       |      |
| CIBE_1733                         | putative spore coat protein                                                                         | n.d                | n.d                                                                       | 1.8                                                        |      |
| CIBE_1735                         | Spore coat protein                                                                                  | 1.61               | n.d                                                                       | 1.78                                                       |      |
| CIBE_1736                         | putative spore coat protein                                                                         | n.d                | n.d                                                                       | 1.67                                                       |      |
| CIBE_1789                         | Multi-sensor signal transduction histidine kinase                                                   | 2.09               | n.d                                                                       | n.d                                                        |      |
| CIBE_1807                         | Sporulation protein                                                                                 | 1.61               | 2.54                                                                      | 3.03                                                       |      |
| CIBE_1819                         | Stage V sporulation protein D                                                                       | 1.59               | n.d                                                                       | -1.39                                                      |      |
| CIBE_1821                         | Stage V sporulation protein D                                                                       | n.d                | n.d                                                                       | -1.4                                                       |      |
| CIBE_1825                         | factor for spore cortex peptidoglycan synthesis (stage V sporulation)                               | n.d                | n.d                                                                       | -0.94                                                      |      |
| CIBE_1845                         | Acetyltransferase                                                                                   | -1.29              | n.d                                                                       | n.d                                                        |      |
| CIBE_2020                         | ATP-binding stage III sporulation protein                                                           | n.d                | 4.02                                                                      | -1.77                                                      |      |
| CIBE_2021                         | Stage III sporulation protein AB                                                                    | n.d                | 4.43                                                                      | -1.66                                                      |      |
| CIBE_2022                         | Stage III sporulation AC family protein                                                             | n.d                | 4.76                                                                      | -1.35                                                      |      |
| CIBE_2023                         | stage III sporulation protein                                                                       | n.d                | 5.52                                                                      | -1.25                                                      |      |
| CIBE_2024                         | Sporulation stage III, protein AE                                                                   | 1.15               | 6.35                                                                      | -1.13                                                      |      |
| CIBE_2025                         | Sporulation stage III, protein AF                                                                   | n.d                | 6.01                                                                      | -1.37                                                      |      |
| CIBE_2026                         | Stage III sporulation protein AG                                                                    | n.d                | 5.54                                                                      | -1.94                                                      |      |
| CIBE_2027                         | Stage III sporulation protein AH                                                                    | 1.88               | 5.67                                                                      | -1.55                                                      |      |
| CIBE_2041                         | Sporulation protein spo0A                                                                           | 1.24               | n.d                                                                       | -1.43                                                      |      |
| CIBE_2218                         | D-alanyl-D-alanine carboxypeptidase DacF                                                            | 1.62               | n.d                                                                       | 3.79                                                       |      |
| CIBE_2221                         | Uncharacterized spore protein YtfJ                                                                  | 1.44               | 2.69                                                                      | 1.53                                                       |      |
| CIBE_2227                         | Transcriptional regulator, MerR family                                                              | n.d                | -1.2                                                                      | -0.92                                                      |      |
| CIBE_2390                         | Sporulation stage II, protein M                                                                     | 3.55               | 7.3                                                                       | 0.99                                                       |      |
| CIBE_2490                         | component of the inner spore coat                                                                   | 3.64               | 6.62                                                                      | 5.17                                                       |      |



| <i>C. beijerinckii</i><br>protein |                                                              | predicted function | Log2 fold change in expression<br>in L-rhamnose relative to D-<br>glucose |                                           |      |
|-----------------------------------|--------------------------------------------------------------|--------------------|---------------------------------------------------------------------------|-------------------------------------------|------|
|                                   |                                                              |                    | 3 h                                                                       | 6.5 h                                     | 10 h |
|                                   |                                                              |                    | CIBE_2491                                                                 | Spore coat peptide assembly protein CotJB | 4.4  |
| CIBE_2492                         | conserved protein of unknown function                        | 5.56               | 8.1                                                                       | 5.65                                      |      |
| CIBE_2495                         | Histidine kinase                                             | n.d                | n.d                                                                       | -0.99                                     |      |
| CIBE_2581                         | dihydroxyacetone kinase, N-terminal domain                   | 1.77               | 2.61                                                                      | 1.14                                      |      |
| CIBE_2775                         | Small, acid-soluble spore protein beta                       | 4.31               | 1.43                                                                      | 1.65                                      |      |
| CIBE_2875                         | PAS/PAC sensor signal transduction histidine kinase          | 1.99               | n.d                                                                       | 1.16                                      |      |
| CIBE_2913                         | Small, acid-soluble spore protein beta                       | 3.53               | 3.43                                                                      | 3.92                                      |      |
| CIBE_2950                         | Histidine kinase                                             | 1.1                | n.d                                                                       | n.d                                       |      |
| CIBE_3040                         | conserved protein of unknown function                        | 2.09               | 5.15                                                                      | 5.24                                      |      |
| CIBE_3507                         | conserved protein of unknown function                        | 3.59               | 5.3                                                                       | 1.53                                      |      |
| CIBE_3532                         | Transcriptional regulator, AbrB family                       | 1.96               | 1.79                                                                      | -1.11                                     |      |
| CIBE_3643                         | Histidine kinase                                             | 1.8                | n.d                                                                       | n.d                                       |      |
| CIBE_3647                         | Sensor histidine kinase                                      | 1.19               | n.d                                                                       | n.d                                       |      |
| CIBE_3649                         | Small acid-soluble spore protein, alpha/beta type            | n.d                | n.d                                                                       | 4.72                                      |      |
| CIBE_3698                         | Small acid-soluble spore protein, alpha/beta type            | 4.67               | 2.07                                                                      | 5.58                                      |      |
| CIBE_3923                         | Spore cortex-lytic protein                                   | 3.74               | 3.76                                                                      | 0.91                                      |      |
| CIBE_3935                         | Small, acid-soluble spore protein beta                       | 2.23               | n.d                                                                       | 4.09                                      |      |
| CIBE_3951                         | Spore protein                                                | 2.93               | n.d                                                                       | 3.68                                      |      |
| CIBE_3965                         | Spore protein                                                | 2.79               | 1.89                                                                      | 5.91                                      |      |
| CIBE_4004                         | conserved protein of unknown function                        | 1.37               | n.d                                                                       | n.d                                       |      |
| CIBE_4085                         | Transcriptional regulator, AbrB family                       | 2.9                | n.d                                                                       | 1.61                                      |      |
| CIBE_4156                         | conserved exported protein of unknown function               | 3.83               | n.d                                                                       | 1.19                                      |      |
| CIBE_4576                         | phosphatase                                                  | 1.04               | n.d                                                                       | n.d                                       |      |
| CIBE_4975                         | 18 kDa heat shock protein                                    | 1.48               | n.d                                                                       | 0.98                                      |      |
| CIBE_5092                         | Sporulation protein YunB                                     | n.d                | 2.48                                                                      | n.d                                       |      |
| CIBE_5119                         | component of the flagellar export machinery                  | 1.41               | n.d                                                                       | n.d                                       |      |
| CIBE_5516                         | Protein Tlp homolog                                          | 3.06               | n.d                                                                       | 5.34                                      |      |
| CIBE_5860                         | putative morphogen                                           | n.d                | -0.92                                                                     | -1.02                                     |      |
| CIBE_5891                         | Transcriptional regulator, AbrB family                       | -1.81              | n.d                                                                       | 1.42                                      |      |
| CIBE_6123                         | chromosome partitioning protein; transcriptional regulator   | n.d                | n.d                                                                       | -0.75                                     |      |
| CIBE_6124                         | DNA-binding protein Spo0J-like                               | n.d                | n.d                                                                       | -1.07                                     |      |
| CIBE_b0010                        | protein of unknown function                                  | 5.24               | 2.27                                                                      | 2.44                                      |      |
| CIBE_0993                         | anti-sigma factor (antagonist of sigma(F)) and serine kinase | n.d                | n.d                                                                       | -2.9                                      |      |
| <b>stress response</b>            |                                                              |                    |                                                                           |                                           |      |
| CIBE_0139                         | class III stress response-related ATPase, AAA+ superfamily   | 0.94               | n.d                                                                       | n.d                                       |      |
| CIBE_0289                         | Rubryerythrin                                                | 2.95               | n.d                                                                       | -0.85                                     |      |
| CIBE_0347                         | chaperonin small subunit                                     | 2.36               | n.d                                                                       | n.d                                       |      |

| <i>C. beijerinckii</i><br>protein |                                                | predicted function | Log2 fold change in expression<br>in L-rhamnose relative to D-<br>glucose |       |       |
|-----------------------------------|------------------------------------------------|--------------------|---------------------------------------------------------------------------|-------|-------|
|                                   |                                                |                    | 3 h                                                                       | 6.5 h | 10 h  |
| CIBE_0348                         | chaperonin large subunit                       |                    | 2.44                                                                      | n.d   | n.d   |
| CIBE_0740                         | Rubrerhythrin                                  |                    | 3.11                                                                      | 4.87  | n.d   |
| CIBE_2142                         | 33 kDa chaperonin                              |                    | -1.22                                                                     | -1.06 | n.d   |
| CIBE_1008                         | Heat-inducible transcription repressor HrcA    |                    | 1.35                                                                      | n.d   | n.d   |
| CIBE_1009                         | Protein GrpE                                   |                    | 1.29                                                                      | n.d   | n.d   |
| CIBE_1010                         | molecular chaperone                            |                    | 1.6                                                                       | n.d   | n.d   |
| CIBE_1502                         | Lon protease                                   |                    | 1.23                                                                      | n.d   | n.d   |
| CIBE_1581                         | ATP-dependent Clp protease proteolytic subunit |                    | n.d                                                                       | n.d   | -0.96 |
| CIBE_1740                         | Superoxide dismutase [Fe]                      |                    | 1.71                                                                      | n.d   | n.d   |
| CIBE_2199                         | Superoxide dismutase [Mn/Fe]                   |                    | 1.75                                                                      | 3.48  | 0.89  |
| CIBE_2745                         | Reverse rubrerhythrin-1                        |                    | 1.6                                                                       | 2.08  | 2.62  |
| CIBE_2934                         | Reverse rubrerhythrin-1                        |                    | 4.38                                                                      | n.d   | n.d   |
| CIBE_3517                         | Rubrerhythrin                                  |                    | 4.54                                                                      | 5.08  | 0.77  |
| CIBE_3635                         | Rubrerhythrin                                  |                    | -1.39                                                                     | n.d   | n.d   |
| CIBE_4975                         | 18 kDa heat shock protein                      |                    | 1.48                                                                      | n.d   | 0.98  |
| CIBE_3943                         | Rubrerhythrin                                  |                    | 2.41                                                                      | 3.1   | 2.43  |

35

36

37

39

40

41

42

43

44

45

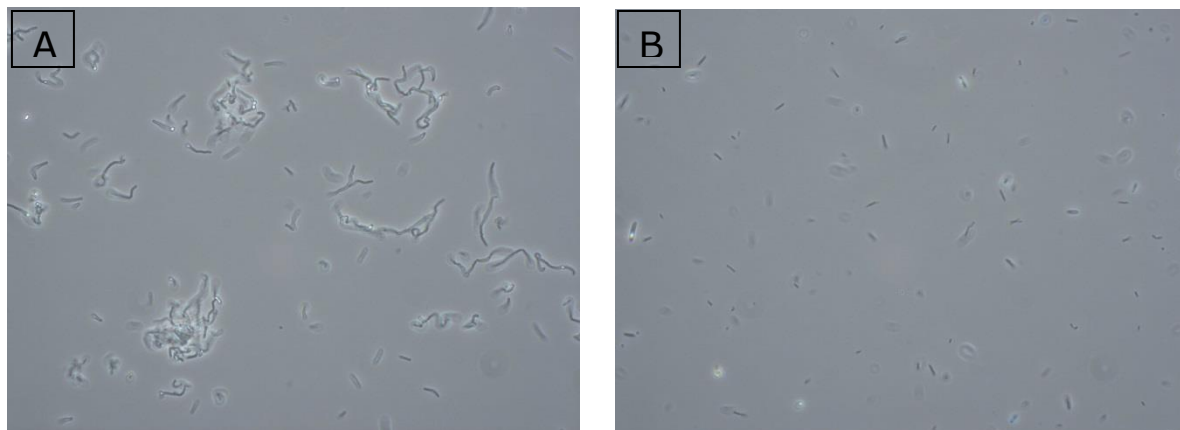

46

47

**Figure S1.** Phase-contrast photographs (1000x) of cultures grown on a glucose/rhamnose mix (A) and on rhamnose (B) after 30 h. of fermentation.

48

49

50

51

52

53

54

55

56

57

58

59

60

61

62

63

64 **Diallo et al**

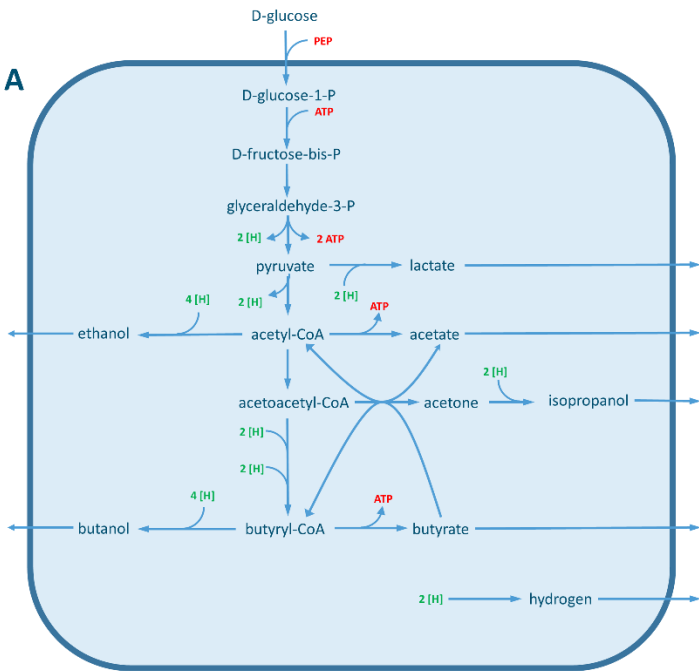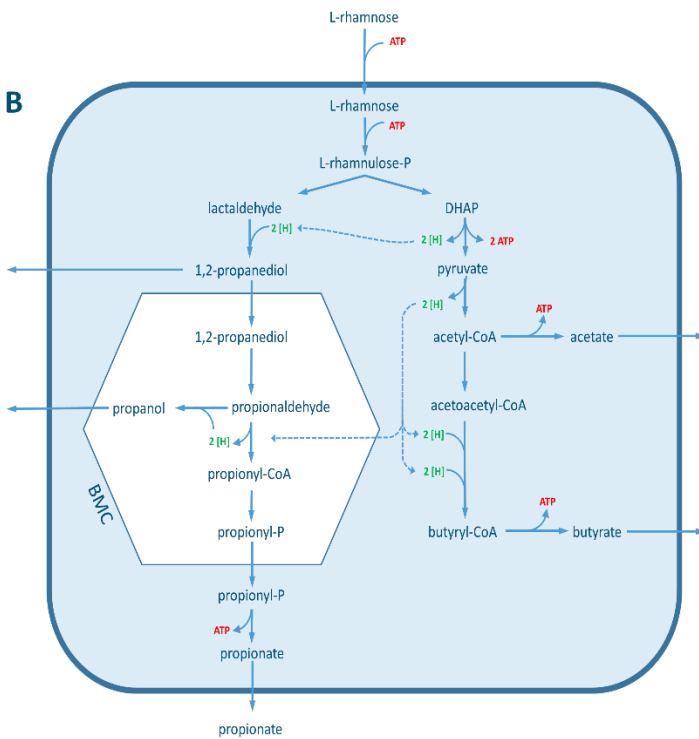

65

66 **Figure S2. Redox balance and energy metabolism in *C. beijerinckii*. A, growth on D-**  
67 **glucose and B, growth on L-rhamnose.**

69 **References**

- 70 1. Bikker P, Krimpen MMv, Houweling-Tan B, Huijgen WJJ, Scaccia N, Wikselaar Pv, Hal  
71 JWv, López-Contreras AM. 2016. Biorefinery of the green seaweed *Ulva lactuca* to  
72 produce chemicals, biofuels and animal feed. *J Appl Phycol* 28:3511-3525.
- 73 2. Máté de Gérando H, Wasels F, Bisson A, Clement B, Bidard F, Jourdier E, López-  
74 Contreras AM, Lopes Ferreira N. 2018. Genome and transcriptome of the natural  
75 isopropanol producer *Clostridium beijerinckii* DSM 6423. *BMC genomics* 19:242.
- 76 3. Saujet L, Monot M, Dupuy B, Soutourina O, Martin-Verstraete I. 2011. The key sigma  
77 factor of transition phase, SigH, controls sporulation, metabolism and virulence factor  
78 expression in *Clostridium difficile*. *J Bacteriol* doi: 10.1128/JB.00272-11 JB. 00272-11.
